# Supplementary material for: Economical and efficient aqueous reductions of high melting-point imines and nitroarenes to amines: promotion effects of granular PTFE
Source: Royal Society of Chemistry journal article supplement (doi:10.1039/c4ra04528a), 2014-07-16

# **Economical and Efficient Aqueous Reductions of High Melting-Point Imines and Nitroarenes to Amines: Promotion Effects of Granular PTFE**

**Tao Li,<sup>‡</sup><sup>a</sup> Xiaoxue Cui,<sup>‡</sup><sup>a</sup> Lili Sun<sup>‡</sup><sup>a</sup> and Chunbao Li<sup>\*a</sup>**

Department of Chemistry, College of Science, Tianjin University, Tianjin, 300072, P.

R. of China. Fax: +862227403475, E-mail: [lichunbao@tju.edu.cn](mailto:lichunbao@tju.edu.cn)

## Contents

General experimental information (S3)

General procedure for the reduction of imines (S3-S9)

Control experiments for the function of Aliquat 336 and granular PTFE in the reduction of imines (S9-S10)

Control experiments for the function of PTC in the reduction of imines (S10-S11)

General procedure for the reduction of nitroarenes (S11-S14)

References (S14-S15)

$^1\text{H}$  NMR and  $^{13}\text{C}$  NMR spectra for new products (S16-S22)

## General experimental information

All of the chemicals were obtained from commercial sources or prepared according to standard methods. The  $^1\text{H}$  NMR (400 or 600 MHz) and  $^{13}\text{C}$  NMR (100 or 150 MHz) were recorded on a Bruker AM-400 spectrometer or a Bruker Avance III spectrometer respectively. Chemical shifts ( $\delta$ ) are reported relative to TMS ( $^1\text{H}$ ) or  $\text{CDCl}_3$  ( $^{13}\text{C}$ ). IR spectra were recorded on BIO-RAD FTS 3000 spectrometer. Melting points were recorded on an X-4 Micro-melting Point Apparatus. High resolution mass spectra (ESI) were obtained on a Bruker micrOTOF-QII. All the aqueous reductions were performed in 100-mL flasks and agitated by a modified stirring rod. The stirring rod was modified by inserting a 25-cm PTFE wire into the blades and has been described previously. The granular PTFE is 70 pieces/g.

## General procedure for the reduction of imines

Zn powder (5 equiv) was added to a mixture of imine (**1a-1m**, 2 g), Aliquat 336 (0.06 equiv), granular PTFE (5 g) and 5% aq NaOH solution (10 mL). The reaction mixture was mechanically stirred for 0.6-2.8 h at room temperature. TLC (thin layer chromatography) was used to determine when the reaction was complete. The aqueous solution was decanted and the solid residue was extracted with a small amount of ethyl acetate and then followed by acidified with conc. HCl to give amine hydrochlorides: **2a** (85%), **2b** (88%), **2c** (89%), **2d** (90%), **2e** (86%), **2f** (90%), **2g** (89%), **2i** (93%), and **2m** (92%). This procedure was applied to the synthesis of **2d** (91%, 8 h) from 11 gram of **1d**. Alternatively the product was crystallized with

ethanol after the ethyl acetate was evaporated to give **2h** (88%), **2j** (95%), **2k** (89%), and **2l** (90%). Products **2a**,<sup>1</sup> **2b**,<sup>2</sup> **2d**,<sup>3</sup> **2j**,<sup>4</sup> **2k**,<sup>5</sup> and **2l**<sup>6</sup> are known compounds.

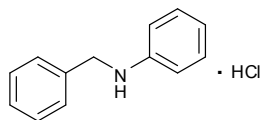

*N*-Phenylbenzylamine hydrochloride (**2a**): Mp 156-159 °C; <sup>1</sup>H NMR (400 MHz, CDCl<sub>3</sub>) δ/ppm: 7.43-7.37 (m, 4H), 7.34-7.30 (m, 1H), 7.22 (dd, *J* = 8.2, 7.6 Hz, 2H), 6.76 (t, *J* = 7.3 Hz, 1H), 6.68 (d, *J* = 7.7 Hz, 2H), 4.37 (s, 2H); IR (KBr, cm<sup>-1</sup>) ν: 2710, 2671, 2555, 2424, 1595, 1494, 1438, 1386, 1202, 1075, 1024, 973, 910, 755, 689, 528, 422.

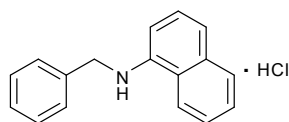

*N*-Benzyl-1-naphthalenamine hydrochloride (**2b**): Mp 150-153 °C; <sup>1</sup>H NMR (400 MHz, CDCl<sub>3</sub>) δ/ppm: 8.44 (d, *J* = 8.4 Hz, 1H), 7.84 (dd, *J* = 29.0, 8.2 Hz, 2H), 7.65 (t, *J* = 7.5 Hz, 1H), 7.58-7.50 (m, 2H), 7.29 (dd, *J* = 11.4, 7.8 Hz, 3H), 7.11 (t, *J* = 6.5 Hz, 3H), 4.65 (s, 2H); IR (KBr, cm<sup>-1</sup>) ν: 2911, 2716, 2662, 2629, 2505, 2361, 1576, 1516, 1448, 1402, 1372, 1291, 1225, 1078, 772, 748, 697, 480.

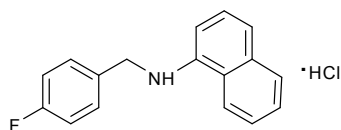

*N*-(4-Fluorobenzyl)-1-naphthalenamine hydrochloride (**2c**): Mp 159-161 °C; <sup>1</sup>H NMR (400 MHz, CDCl<sub>3</sub>) δ/ppm: 8.42 (d, *J* = 8.5 Hz, 1H), 7.87 (dd, *J* = 20.7, 8.2 Hz, 2H), 7.67 (t, *J* = 7.3 Hz, 1H), 7.60-7.52 (m, 2H), 7.32 (t, *J* = 7.8 Hz, 1H), 7.24 (dd, *J* = 8.4, 5.3 Hz, 2H), 6.75 (t, *J* = 8.6 Hz, 2H), 4.65 (s, 2H); <sup>13</sup>C NMR (101 MHz, CDCl<sub>3</sub>) δ/ppm: 163.22 (d, *J* = 249.7 Hz), 134.27, 133.26 (d, *J* = 8.6 Hz), 130.06, 129.72,

128.85, 128.04, 127.07, 126.34, 125.38 (d,  $J = 3.3$  Hz), 124.80, 123.29, 121.59, 115.44 (d,  $J = 21.7$  Hz), 54.68; IR (KBr,  $\text{cm}^{-1}$ )  $\nu$ : 2894, 2768, 2668, 2591, 2542, 1601, 1574, 1511, 1449, 1404, 1222, 1162, 839, 799, 771, 542, 465, 427; ESI HRMS: Calcd: 252.1183 ( $\text{C}_{17}\text{H}_{14}\text{FN} + \text{H}^+$ ); Found:  $m/z = 252.1186$ .

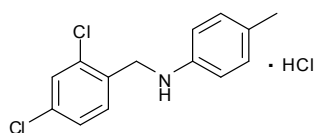

*N*-(2,4-Dichlorobenzyl)-4-methylaniline hydrochloride (**2d**): Mp 152-155 °C;  $^1\text{H}$  NMR (400 MHz,  $\text{CDCl}_3$ )  $\delta$ /ppm: 7.86 (d,  $J = 8.4$  Hz, 1H), 7.28 (t,  $J = 5.7$  Hz, 3H), 7.13 (d,  $J = 8.1$  Hz, 2H), 7.09 (dd,  $J = 8.3, 1.9$  Hz, 1H), 4.55 (s, 2H), 2.34 (s, 3H); IR (KBr,  $\text{cm}^{-1}$ )  $\nu$ : 2895, 2691, 2622, 2541, 2410, 1585, 1511, 1472, 1438, 1387, 1199, 1100, 1056, 860, 819, 567, 534, 495, 420.

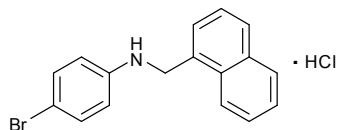

4-Bromo-*N*-(1-naphthalenylmethyl)aniline hydrochloride (**2e**): Mp 120-123 °C;  $^1\text{H}$  NMR (400 MHz,  $\text{CDCl}_3$ )  $\delta$ /ppm: 7.90-7.87 (m, 1H), 7.81 (d,  $J = 7.7$  Hz, 2H), 7.58 (d,  $J = 7.0$  Hz, 1H), 7.50-7.48 (m, 2H), 7.38-7.27 (m, 3H), 7.11 (d,  $J = 8.6$  Hz, 2H), 4.84 (s, 2H);  $^{13}\text{C}$  NMR (101 MHz,  $\text{CDCl}_3$ )  $\delta$ /ppm: 135.88, 133.55, 132.54, 131.56, 130.21, 130.02, 128.83, 127.10, 126.24, 125.19, 124.88, 123.57, 123.45, 122.95, 51.14; IR (KBr,  $\text{cm}^{-1}$ )  $\nu$ : 2870, 2814, 2685, 2624, 2536, 2425, 1593, 1510, 1485, 1427, 1370, 1070, 1015, 960, 808, 775, 514, 486, 422; ESI HRMS: Calcd: 312.0382 ( $\text{C}_{17}\text{H}_{14}^{79}\text{BrN} + \text{H}^+$ ); Found:  $m/z = 312.0380$ ; Calcd: 314.0362 ( $\text{C}_{17}\text{H}_{14}^{81}\text{BrN} + \text{H}^+$ ); Found:  $m/z = 314.0367$ .

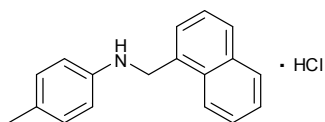

4-Methyl-*N*-(1-naphthalenylmethyl)aniline hydrochloride (**2f**): Mp 140-142 °C; <sup>1</sup>H NMR (400 MHz, CDCl<sub>3</sub>) δ/ppm: 7.90-7.88 (m, 1H), 7.78 (d, *J* = 7.9 Hz, 2H), 7.65 (d, *J* = 7.0 Hz, 1H), 7.48-7.43 (m, 2H), 7.37-7.33 (m, 1H), 7.18 (d, *J* = 8.3 Hz, 2H), 6.96 (d, *J* = 8.1 Hz, 2H), 4.83 (s, 2H), 2.22 (s, 3H); <sup>13</sup>C NMR (101 MHz, CDCl<sub>3</sub>) δ/ppm: 139.14, 133.39, 131.76, 131.66, 130.85, 130.24, 129.98, 128.63, 126.96, 126.07, 125.68, 125.12, 123.76, 123.13, 52.03, 20.97; IR (KBr, cm<sup>-1</sup>) *v*: 3046, 2875, 2824, 2693, 2635, 2543, 2425, 1596, 1511, 1464, 1427, 1374, 1022, 966, 804, 775, 532, 489, 441, 422; ESI HRMS: Calcd: 248.1434 (C<sub>18</sub>H<sub>17</sub>N + H<sup>+</sup>); Found: *m/z* = 248.1435.

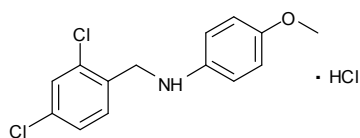

*N*-(2,4-Dichlorobenzyl)-4-methoxyaniline hydrochloride (**2g**): Mp 152-155 °C; <sup>1</sup>H NMR (CDCl<sub>3</sub>, 400 MHz): δ /ppm: 7.86 (d, *J* = 8.4 Hz, 1H), 7.30 (dd, *J* = 14.5, 5.5 Hz, 3H), 7.14 (dd, *J* = 8.3, 2.0 Hz, 1H), 6.82 (d, *J* = 8.9 Hz, 2H), 4.53 (s, 2H), 3.79 (s, 3H); <sup>13</sup>C NMR (CDCl<sub>3</sub>, 101 MHz): δ/ppm: 160.08, 136.33, 136.21, 133.86, 129.45, 127.68, 126.54, 125.02, 114.86, 55.48, 51.52; IR (KBr, cm<sup>-1</sup>) *v*: 2884, 2833, 2784, 2693, 2630, 2558, 2420, 1589, 1510, 1474, 1431, 1386, 1255, 1190, 1029, 866, 827, 721, 551, 524, 451; ESI HRMS: Calcd: 282.0447 (C<sub>14</sub>H<sub>13</sub>Cl<sub>2</sub>NO + H<sup>+</sup>); Found: *m/z* = 282.0447.

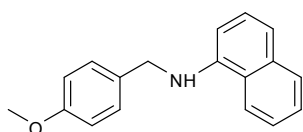

*N*-(4-Methoxybenzyl)-1-naphthalenamine (**2h**): Mp 67-69 °C; <sup>1</sup>H NMR (CDCl<sub>3</sub>, 400 MHz): δ/ppm: 7.84 (d, *J* = 8.7 Hz, 2H), 7.51-7.35 (m, 5H), 7.29 (d, *J* = 7.4 Hz, 1H),

6.95 (d,  $J = 8.5$  Hz, 2H), 6.68 (d,  $J = 7.5$  Hz, 1H), 4.45 (s, 2H), 3.86 (s, 3H);  $^{13}\text{C}$  NMR ( $\text{CDCl}_3$ , 101 MHz):  $\delta/\text{ppm}$ : 159.09, 143.37, 134.38, 131.16, 129.12, 128.75, 126.72, 125.81, 124.78, 123.47, 120.02, 117.63, 114.20, 104.77, 55.37, 48.15; IR (KBr,  $\text{cm}^{-1}$ )  $\nu$ : 3439, 3047, 2998, 2891, 2837, 1585, 1533, 1508, 1441, 1408, 1340, 1294, 1241, 1169, 1026, 816, 769, 425; ESI HRMS: Calcd: 264.1383 ( $\text{C}_{18}\text{H}_{17}\text{NO} + \text{H}^+$ ); Found:  $m/z = 264.1366$ .

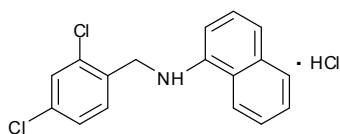

*N*-(2,4-Dichlorobenzyl)-1-naphthalenamine hydrochloride (**2i**): Mp 125-127 °C;  $^1\text{H}$  NMR ( $\text{CDCl}_3$ , 400 MHz):  $\delta/\text{ppm}$ : 8.48 (d,  $J = 8.5$  Hz, 1H), 7.96 (d,  $J = 8.3$  Hz, 1H), 7.88 (dd,  $J = 14.9, 8.2$  Hz, 2H), 7.67 (t,  $J = 7.4$  Hz, 1H), 7.57 (dd,  $J = 15.2, 7.5$  Hz, 2H), 7.33 (t,  $J = 7.8$  Hz, 1H), 7.12 (d,  $J = 1.9$  Hz, 1H), 7.04 (dd,  $J = 8.3, 1.9$  Hz, 1H), 4.82 (s, 2H);  $^{13}\text{C}$  NMR ( $\text{CDCl}_3$ , 101 MHz):  $\delta/\text{ppm}$ : 136.64, 136.27, 134.42, 134.32, 130.19, 129.95, 129.30, 128.80, 127.92, 127.49, 127.07, 126.83, 126.47, 124.87, 122.58, 121.48, 51.11; IR (KBr,  $\text{cm}^{-1}$ )  $\nu$ : 2928, 2736, 2631, 2582, 2535, 2456, 2367, 1569, 1518, 1473, 1443, 1394, 1262, 1102, 1052, 993, 937, 903, 802, 766, 733, 499, 456; ESI HRMS: Calcd: 302.0498 ( $\text{C}_{17}\text{H}_{13}\text{Cl}_2\text{N} + \text{H}^+$ ); Found:  $m/z = 302.0501$ .

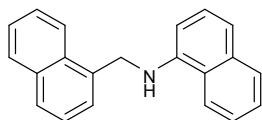

*N*-(1-Naphthalenylmethyl)-1-naphthalenamine (**2j**): Mp 125-128 °C;  $^1\text{H}$  NMR (400 MHz,  $\text{CDCl}_3$ )  $\delta/\text{ppm}$ : 8.19-8.16 (m, 1H), 7.98-7.96 (m, 1H), 7.88 (dd,  $J = 15.7, 8.2$  Hz, 2H), 7.76 (d,  $J = 8.4$  Hz, 1H), 7.63 (d,  $J = 6.9$  Hz, 1H), 7.56 (dd,  $J = 6.6, 2.7$  Hz, 2H), 7.51-7.47 (m, 2H), 7.45-7.38 (m, 2H), 7.33 (d,  $J = 8.2$  Hz, 1H), 6.80 (d,  $J = 7.5$

Hz, 1H), 4.94 (s, 2H); IR (KBr,  $\text{cm}^{-1}$ ) v: 3433, 3048, 2831, 1578, 1526, 1477, 1407, 1314, 1282, 1121, 1079, 1016, 791, 765, 418.

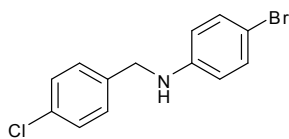

4-Bromo-*N*-(4-chlorobenzyl)aniline (**2k**): Mp 78-79 °C;  $^1\text{H}$  NMR (400 MHz,  $\text{CDCl}_3$ )  $\delta$ /ppm: 7.34-7.25 (m, 6H), 6.50 (d,  $J = 8.4$  Hz, 2H), 4.30 (s, 2H); IR (KBr,  $\text{cm}^{-1}$ ) v: 3400, 3023, 2925, 2850, 1590, 1492, 1464, 1398, 1310, 1242, 1179, 1088, 1009, 876, 813, 617, 503.

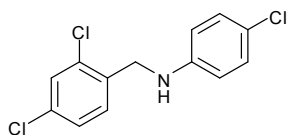

4-Chloro-*N*-(2,4-dichlorobenzyl)aniline (**2l**): Mp 69-72 °C;  $^1\text{H}$  NMR (400 MHz,  $\text{CDCl}_3$ )  $\delta$ /ppm: 7.43 (d,  $J = 1.9$  Hz, 1H), 7.32 (d,  $J = 8.3$  Hz, 1H), 7.23-7.19 (m, 1H), 7.13 (d,  $J = 8.8$  Hz, 2H), 6.52 (d,  $J = 8.8$  Hz, 2H), 4.39 (d,  $J = 5.8$  Hz, 2H); IR (KBr,  $\text{cm}^{-1}$ ) v: 3401, 2863, 1591, 1498, 1470, 1391, 1314, 1244, 1090, 1051, 872, 812.

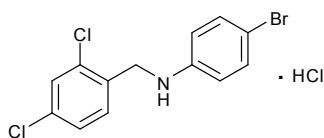

4-Bromo-*N*-(2,4-dichlorobenzyl)aniline hydrochloride (**2m**): Mp 128-130 °C;  $^1\text{H}$  NMR ( $\text{CDCl}_3$ , 400 MHz):  $\delta$ /ppm: 7.81 (d,  $J = 8.3$  Hz, 1H), 7.49 (d,  $J = 8.7$  Hz, 2H), 7.32-7.27 (m, 3H), 7.16 (dd,  $J = 8.3, 1.9$  Hz, 1H), 4.55 (s, 2H);  $^{13}\text{C}$  NMR ( $\text{CDCl}_3$ , 101 MHz):  $\delta$ /ppm: 136.59, 136.25, 133.66, 133.48, 133.02, 129.65, 127.81, 126.33, 125.16, 123.44, 51.28; IR (KBr,  $\text{cm}^{-1}$ ) v: 2889, 2818, 2690, 2617, 2538, 2409, 1586, 1482, 1437, 1389, 1196, 1102, 1062, 1011, 861, 825, 563, 512, 417; ESI HRMS:



Calcd: 329.9446 ( $C_{13}H_{10}^{79}BrCl_2N + H^+$ ); Found:  $m/z = 329.9446$ ; Calcd: 331.9426 ( $C_{13}H_{10}^{81}BrCl_2N + H^+$ ); Found:  $m/z = 331.9425$ .

### **Control experiments for the function of Aliquat 336 and granular PTFE in the reduction of imines**

#### 1. Reduction of **1a** without Aliquat 336 and granular PTFE

Zn powder (5 equiv, 0.06 mol) was added to a mixture of **1a** (2 g) and 5% aq. NaOH solution (10 mL). The reaction mixture was stirred for 40 min at room temperature. TLC indicated that the reaction did not take place. After 13 h,  $^1H$  NMR indicated that the reaction was complete.

#### 2. Reduction of **1b** without Aliquat 336 and granular PTFE

Zn powder (5 equiv, 0.04 mol) was added to a mixture of **1b** (2 g) and 5% aq. NaOH solution (10 mL). The reaction mixture was stirred for 50 min at room temperature. TLC indicated that the reaction did not take place. After 24 h,  $^1H$  NMR indicated that the reaction was complete.

#### 3. Reduction of **1h** without Aliquat 336 and granular PTFE

Zn powder (5 equiv, 0.04 mol) was added to a mixture of **1h** (2 g) and 5% aq. NaOH solution (10 mL). The reaction mixture was stirred for 2.8 h at room temperature. TLC indicated that the reaction did not take place. After 72 h,  $^1H$  NMR indicated that half of reaction was complete.

#### 4. Reduction of **1d** without Aliquat 336

Zn powder (5 equiv, 0.04 mol) was added to a mixture of **1d** (2 g), granular PTFE (5

g), and 5% aq. NaOH solution (10 mL). The reaction mixture was stirred for 0.75 h at room temperature. TLC indicated that the reaction did not take place. After 20 h, <sup>1</sup>H NMR indicated that the reaction was complete.

### **Control experiments for the function of PTC in the reduction of imines**

#### 1. Reduction of **1j** with benzyltriethylammonium chloride

Zn powder (5 equiv, 0.04 mol) was added to a mixture of **1j** (2 g), benzyltriethylammonium chloride (0.06 equiv, 0.43 mmol) and 5% aq. NaOH solution (10 mL). The reaction mixture was stirred for 1.2 h at room temperature. <sup>1</sup>H NMR indicated that the reaction did not take place.

#### 2. Reduction of **1k** with tetrabutylammonium bromide

Zn powder (5 equiv, 0.04 mol) was added to a mixture of **1k** (2 g), tetrabutylammonium bromide (0.06 equiv, 0.41 mmol) and 5% aq. NaOH solution (10 mL). The reaction mixture was stirred for 1.8 h at room temperature. <sup>1</sup>H NMR indicated that the reaction did not take place.

#### 3. Reduction of **1f** with sodium dodecanesulfonate

Zn powder (5 equiv, 0.04 mol) was added to a mixture of **1f** (2 g), sodium dodecanesulfonate (0.06 equiv, 0.49 mmol) and 5% aq. NaOH solution (10 mL). The reaction mixture was stirred for 40 min at room temperature. <sup>1</sup>H NMR indicated that the reaction did not take place.

#### 4. Reduction of **1m** in Aliquat 336

Zn powder (5 equiv, 0.04 mol) was added to a mixture of **1m** (2 g), 5% aq. NaOH

solution (5 mL) and Aliquat 336 (15 mL). The reaction mixture was stirred for 0.75 h at room temperature. <sup>1</sup>H NMR indicated that the reaction did not take place.

#### 5. Reduction of **11** with liquid *N*-butyl-*N*-methyl imidazolium chloride

Zn powder (5 equiv, 0.04 mol) was added to a mixture of **11** (2 g), *N*-butyl-*N*-methyl imidazolium chloride (0.06 equiv, 0.42 mmol) and 5% aq. NaOH solution (10 mL).

The reaction mixture was stirred for 1.5 h at room temperature. <sup>1</sup>H NMR indicated that the reaction did not take place.

### General procedure for the reduction of nitroarenes

Zn powder (7 equiv) was added to a mixture of nitroarene (**3a-3k**, 2 g), Aliquat 336 (0.06 equiv), NH<sub>4</sub>Cl (2 equiv), granular PTFE (5 g) and H<sub>2</sub>O (20 mL). The reaction mixture was mechanically stirred for 0.25-13 h at room temperature. TLC (thin layer chromatography) was used to determine when the reaction was complete. The aqueous solution was decanted and the solid residue was extracted with a small amount of ethyl acetate and then followed by acidified with conc. HCl to give amine hydrochlorides: **4a** (87%), **4b** (92%), and **4e** (90%). Alternatively after the ethyl acetate was evaporated the product was crystallized with ethanol to give **4c** (86%), and **4d** (88%) or distillation under vacuum to give **4f** (82%), **4g** (88%), **4h** (86%), **4i** (92%), **4j** (91%), and **4k** (88%). Products **4a-4k** are known compounds.<sup>7-17</sup>

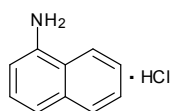

1-naphthalenamine hydrochloride (**4a**): Mp >200 °C (decomp.); <sup>1</sup>H NMR (400 MHz, D<sub>2</sub>O) δ/ppm: 7.82 (dd, *J* = 16.7, 8.4 Hz, 3H), 7.59 (t, *J* = 7.6 Hz, 1H), 7.51 (t, *J* = 7.5

Hz, 1H), 7.45 (d,  $J = 7.3$  Hz, 1H), 7.38 (m, 1H); IR (KBr,  $\text{cm}^{-1}$ )  $\nu$ : 2833, 2624, 2600, 1606, 1566, 1531, 1455, 1396, 1269, 793, 767, 568, 480, 455, 409.

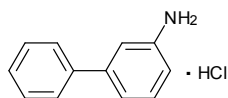

3-Phenylaniline hydrochloride (**4b**): Mp 152-155 °C;  $^1\text{H}$  NMR (400 MHz,  $\text{D}_2\text{O}$ )  $\delta$ /ppm: 7.56-7.43 (m, 5H), 7.41-7.22 (m, 4H); IR (KBr,  $\text{cm}^{-1}$ )  $\nu$ : 2890, 2622, 1598, 1575, 1535, 1480, 1426, 1123, 870, 789, 752, 695, 580, 533, 505, 453, 426.

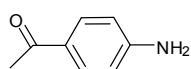

1-(4-Aminophenyl)ethanone (**4c**): Mp 100-102 °C;  $^1\text{H}$  NMR (600 MHz,  $\text{CDCl}_3$ )  $\delta$ /ppm: 7.81-7.80 (m, 2H), 6.65-6.64 (m, 2H), 4.14 (s, 2H), 2.50 (s, 3H); IR (KBr,  $\text{cm}^{-1}$ )  $\nu$ : 3395, 3330, 3221, 1648, 1593, 1562, 1437, 1360, 1306, 1278, 1174, 1133, 958, 840, 594, 562.

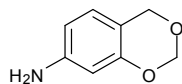

4H-1,3-Benzodioxin-7-amine (**4d**): Mp 98-100 °C;  $^1\text{H}$  NMR (400 MHz,  $\text{CDCl}_3$ )  $\delta$ /ppm: 6.74 (d,  $J = 8.1$  Hz, 1H), 6.31 (dd,  $J = 8.1, 2.0$  Hz, 1H), 6.23 (d,  $J = 1.9$  Hz, 1H), 5.22 (s, 2H), 4.83 (s, 2H), 3.66 (s, 2H); IR (KBr,  $\text{cm}^{-1}$ )  $\nu$ : 3457, 3369, 3027, 2870, 2791, 1631, 1579, 1512, 1467, 1451, 1405, 1361, 1313, 1185, 1107, 1065, 996, 938, 841, 810, 556.

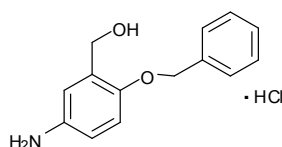

[5-Amino-2-(benzyloxy)phenyl]methanol hydrochloride (**4e**): Mp >190 °C (decomp.);  $^1\text{H}$  NMR (400 MHz,  $\text{D}_2\text{O}$ )  $\delta$ /ppm: 7.38-7.27 (m, 6H), 7.18 (dd,  $J = 8.7, 2.5$  Hz, 1H),

7.04 (d,  $J = 8.8$  Hz, 1H), 5.09 (s, 2H), 4.58 (s, 2H); IR (KBr,  $\text{cm}^{-1}$ )  $\nu$ : 3284, 3033, 2870, 2559, 1552, 1498, 1456, 1378, 1288, 1254, 1211, 1108, 1042, 1001, 913, 850, 812, 746, 694, 620, 549, 461.

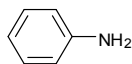

Aniline (**4f**):  $^1\text{H}$  NMR (600 MHz,  $\text{CDCl}_3$ )  $\delta$ /ppm: 7.15 (dd,  $J=8.3, 7.5$ , 2H), 6.75 (t,  $J=7.4$ , 1H), 6.69-6.67 (m, 2H), 3.62 (s, 2H); IR (KBr,  $\text{cm}^{-1}$ )  $\nu$ : 3429, 3355, 3214, 3071, 3034, 1622, 1605, 1498, 1472, 1276, 1174, 881, 754, 691, 503.

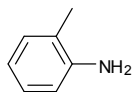

*o*-Toluidine (**4g**):  $^1\text{H}$  NMR (600 MHz,  $\text{CDCl}_3$ )  $\delta$ /ppm: 7.05-7.02 (m, 2H), 6.72-6.69 (m, 1H), 6.67 (d,  $J=7.8$ , 1H), 3.57 (s, 2H), 2.16 (s, 3H); IR (KBr,  $\text{cm}^{-1}$ )  $\nu$ : 3449, 3370, 3224, 3023, 2929, 1623, 1586, 1498, 1467, 1303, 1269, 1148, 1035, 752, 712, 671, 536, 440.

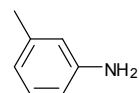

*m*-Toluidine (**4h**):  $^1\text{H}$  NMR (600 MHz,  $\text{CDCl}_3$ )  $\delta$ /ppm: 7.04 (t,  $J=7.7$ , 1H), 6.58 (d,  $J=7.5$ , 1H), 6.51-6.49 (m, 2H), 3.58 (s, 2H), 2.26 (s, 3H); IR (KBr,  $\text{cm}^{-1}$ )  $\nu$ : 3432, 3354, 3217, 3033, 2919, 2859, 1622, 1493, 1468, 1292, 1168, 996, 925, 867, 776, 689, 556, 535, 440.

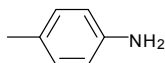

*p*-Toluidine (**4i**): Mp 41-42 °C;  $^1\text{H}$  NMR (600 MHz,  $\text{CDCl}_3$ )  $\delta$ /ppm: 6.96 (d,  $J=8.1$ , 2H), 6.60 (d,  $J=8.2$ , 2H), 3.51 (s, 2H), 2.24 (s, 3H); IR (KBr,  $\text{cm}^{-1}$ )  $\nu$ : 3417, 3336, 3220, 3016, 2913, 2859, 1623, 1514, 1272, 1175, 1120, 813, 761, 722, 688, 505.

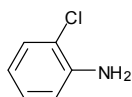

2-Chloroaniline (**4j**):  $^1\text{H}$  NMR (600 MHz,  $\text{CDCl}_3$ )  $\delta$ /ppm: 7.25-7.23 (m, 1H), 7.07-7.04 (m, 1H), 6.76 (dd,  $J=8.0, 1.2$ , 1H), 6.70-6.67 (m, 1H), 4.02 (s, 2H); IR (KBr,  $\text{cm}^{-1}$ )  $\nu$ : 3470, 3380, 3199, 3068, 3026, 1617, 1487, 1450, 1308, 1260, 1153, 1080, 1050, 1023, 929, 839, 746, 677, 533, 436.

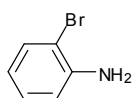

2-Bromoaniline (**4k**):  $^1\text{H}$  NMR (600 MHz,  $\text{CDCl}_3$ )  $\delta$ /ppm: 7.40 (d,  $J=8.0$ , 1H), 7.10 (t,  $J=7.6$ , 1H), 6.76 (dd,  $J=8.0, 1.2$ , 1H), 6.61 (t,  $J=7.6$ , 1H), 4.06 (s, 2H); IR (KBr,  $\text{cm}^{-1}$ )  $\nu$ : 3463, 3413, 3377, 3301, 3191, 3065, 1617, 1482, 1445, 1307, 1257, 1152, 1066, 1043, 1016, 931, 848, 747, 657, 531, 433.

## References

- 1 B. Carboni, M. Vaultier, T. Courgeon and R. Carrie, *Bull. Soc. Chim. Fr.*, 1989, **6**, 844-849.
- 2 A. Bisai, S. De, D. Dey, B. N. Kakde and S. Mishra, *J. Org. Chem.*, 2013, **78**, 7823-7844.
- 3 J. Gao, G. -W. Wang, J. -J. Xia and Z. Zhang, *Org. Biomol. Chem.*, 2005, **3**, 1617-1619.
- 4 M. Paventi and A. S. Hay, *J. Org. Chem.*, 1991, **56**, 5875-5882.
- 5 *Eur. Pat.*, EP 2272817 A1, 2011.
- 6 G. N. Walker and M. A. Klett, *J. Med. Chem.*, 1966, **9**, 624-630.

- 7 S. Chiba, M. Kitamura, K. Narasaka and T. Suga, *Org. Lett.*, 2004, **6**, 4619-4621.
- 8 G. C. Levy, T. Holak and A. Steigel, *J. Am. Chem. Soc.*, 1976, **98**, 495-499.
- 9 N. Desmira, Y. Motoyama, M. Taguchi, I. Mochida, H. Nagashima and S. -H. Yoon, *Chem. Asian J.*, 2014, **9**, 71-74.
- 10 M. Antoine, *Chim. Ther.*, 1972, **7**, 443-449.
- 11 *US Pat.*, US 20080004241 A1, 2008.
- 12 O. Kreye, M. A. Meier and S. Wald, *Adv. Synth. Catal.*, 2013, **355**, 81-86.
- 13 B. Devi Bala, S. Michael Rajesh and S. Perumal, *Green Chem.*, 2012, **14**, 2484-2490.
- 14 J. F. Hartwig and D. -Y. Lee, *Org. Lett.*, 2005, **7**, 1169-1172.
- 15 M. W. Luedtke, A. Yoshimura and V. V. Zhdankin, *J. Org. Chem.*, 2012, **77**, 2087-2091.
- 16 D. Cantillo, C. O. Kappe and M. M. Moghaddam, *J. Org. Chem.*, 2013, **78**, 4530-4542.
- 17 S. M. Islam, M. Mobarak, P. Mondal, A. S. Roy, K. Tuhina and J. Mondal, *Tetrahedron Lett.*, 2012, **53**, 127-131.

# $^1\text{H}$ NMR and $^{13}\text{C}$ NMR for new compounds

*N*-(4-Fluorobenzyl)-1-naphthalenamine hydrochloride (**2c**):

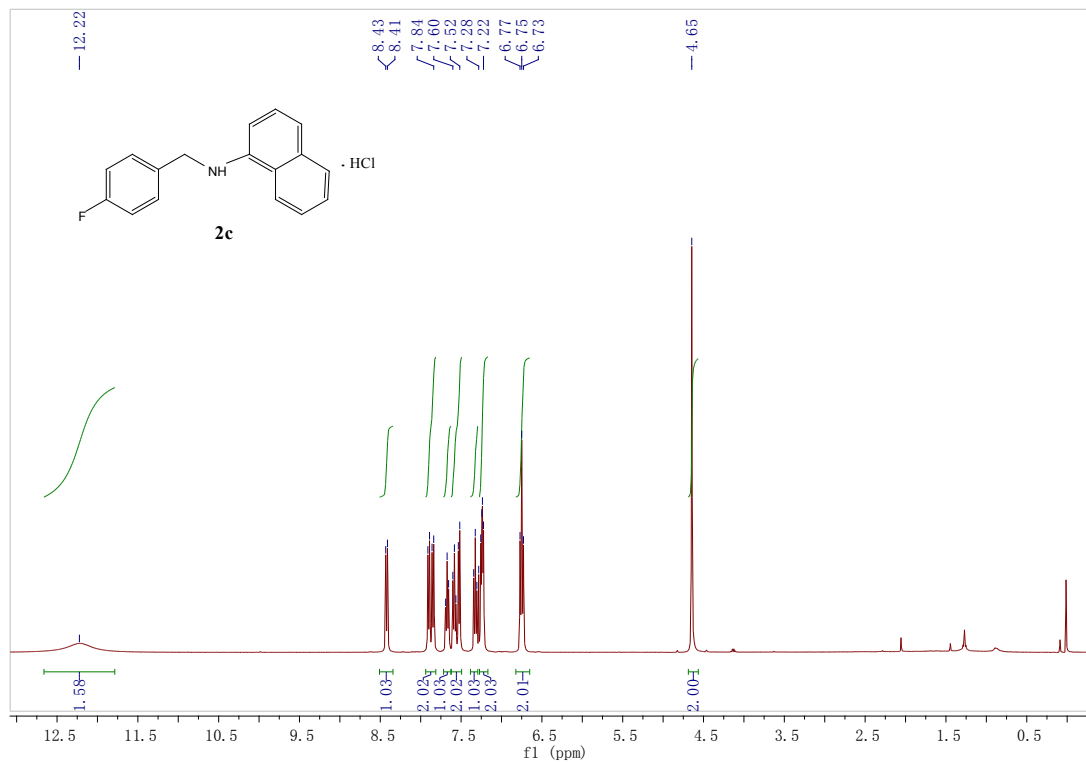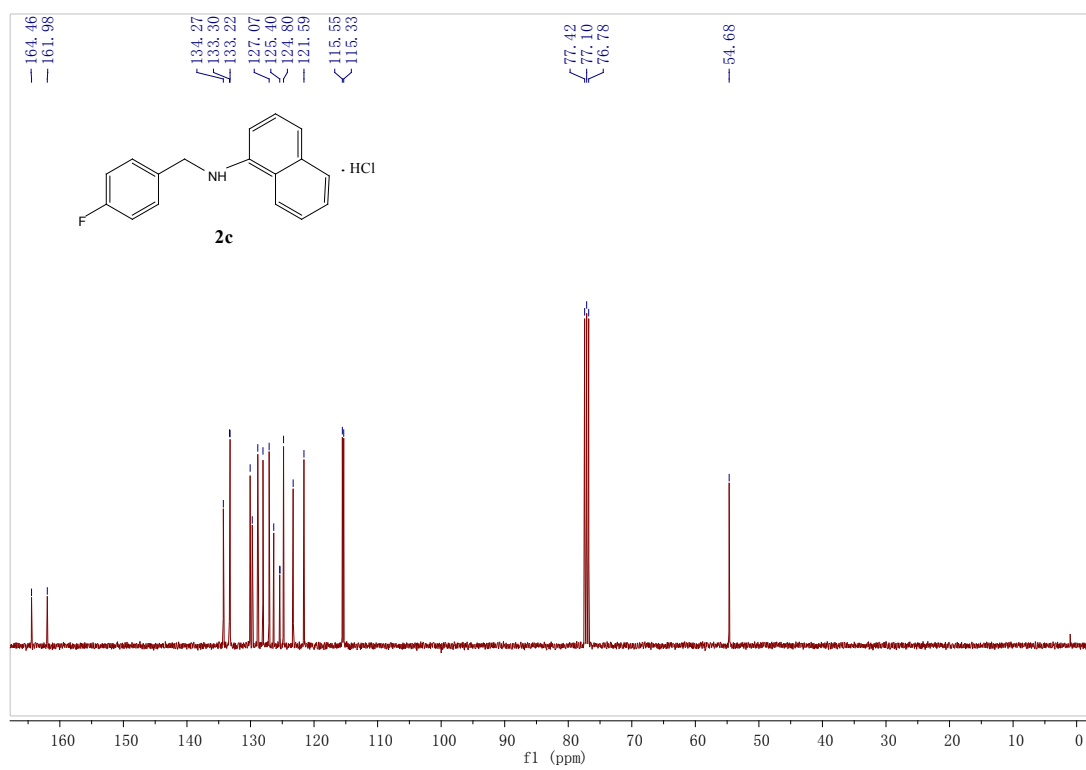



4-Bromo-N-(1-naphthalenylmethyl)aniline hydrochloride (**2e**):

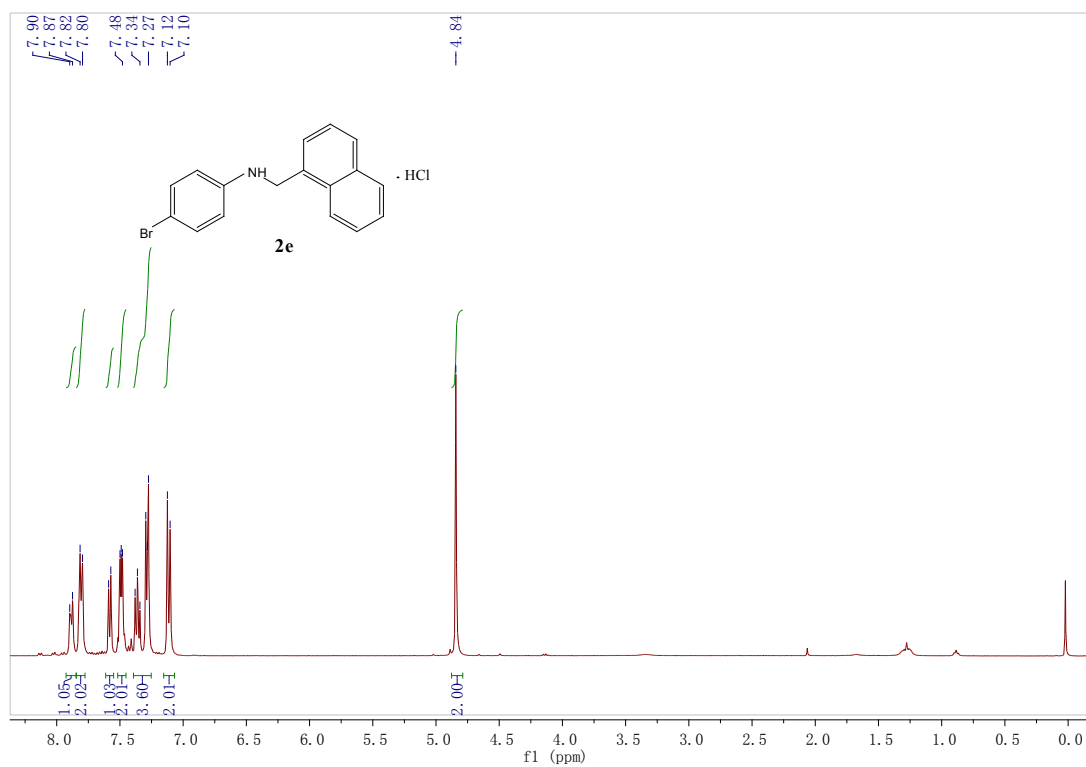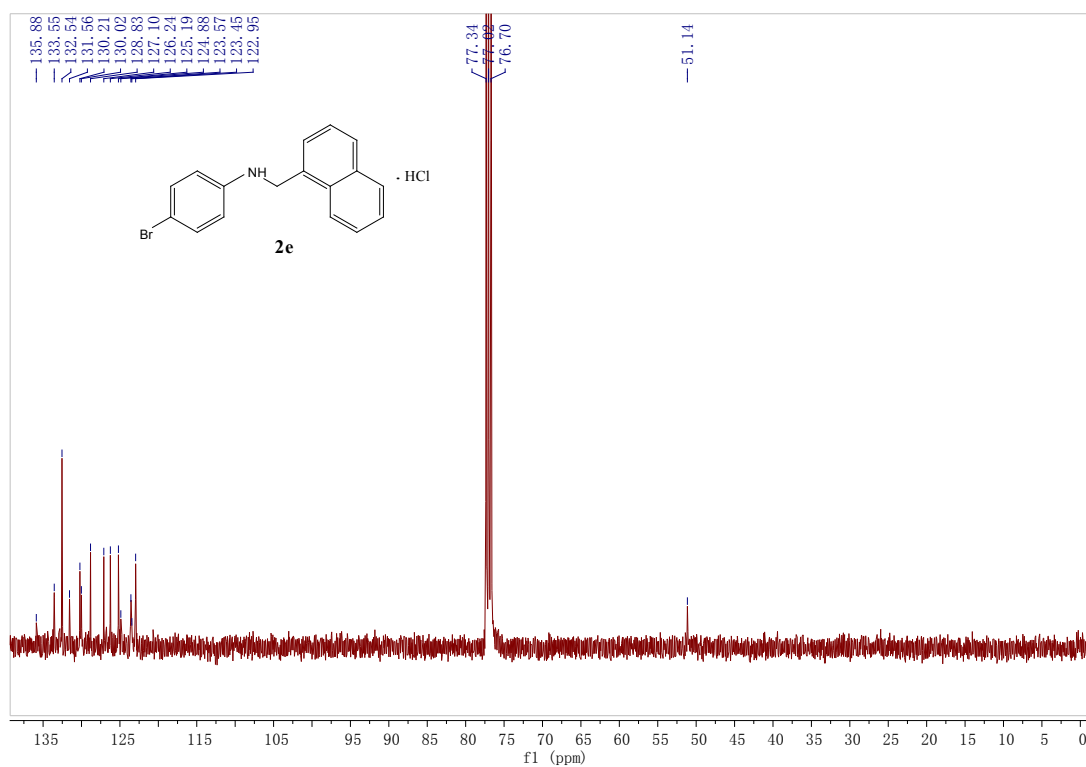

4-Methyl-N-(1-naphthalenylmethyl)aniline hydrochloride (**2f**):

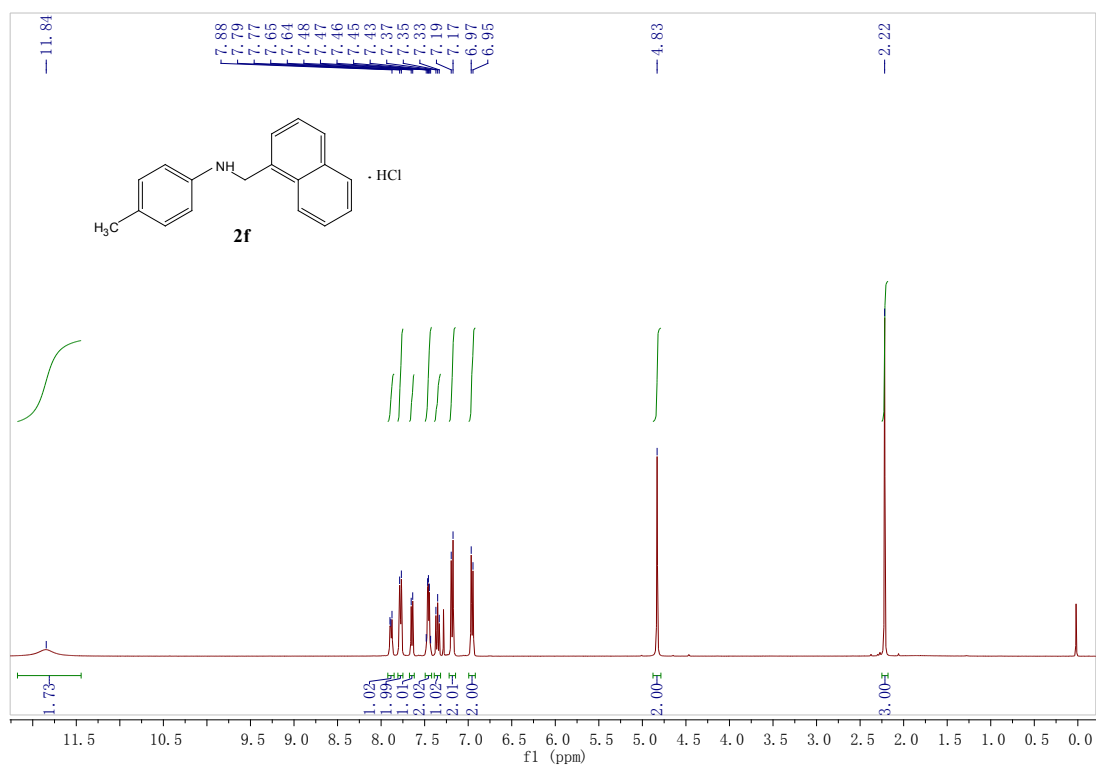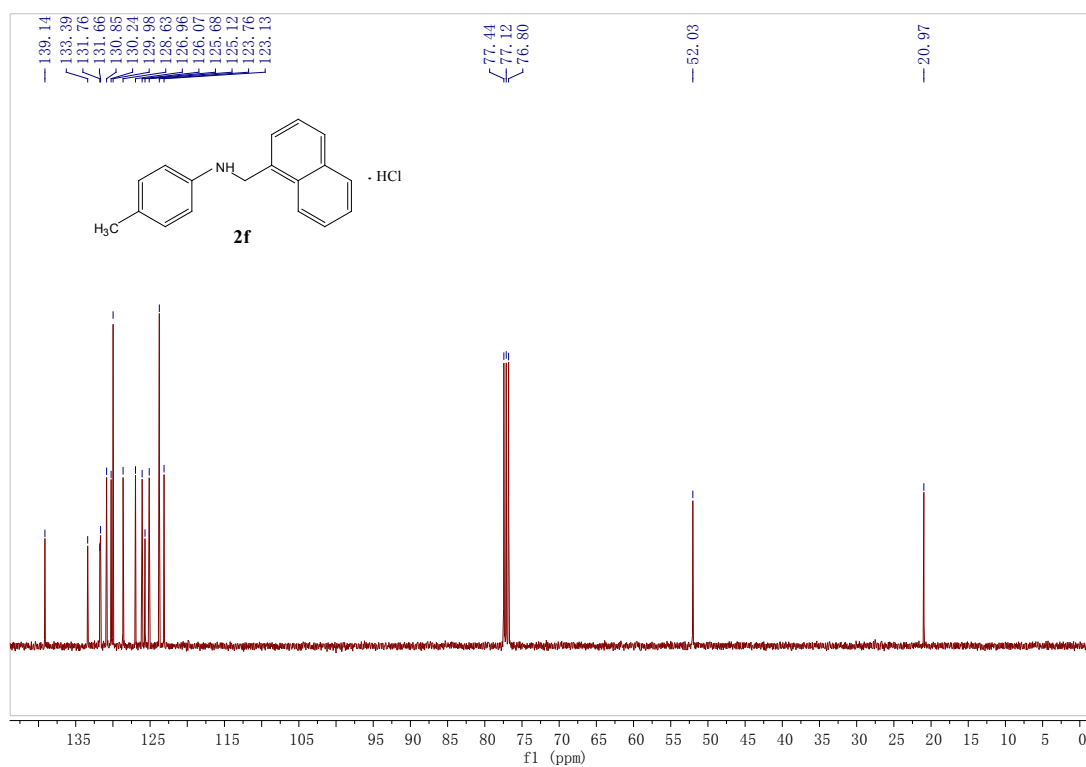

*N*-(2,4-Dichlorobenzyl)-4-methoxyaniline hydrochloride (**2g**):

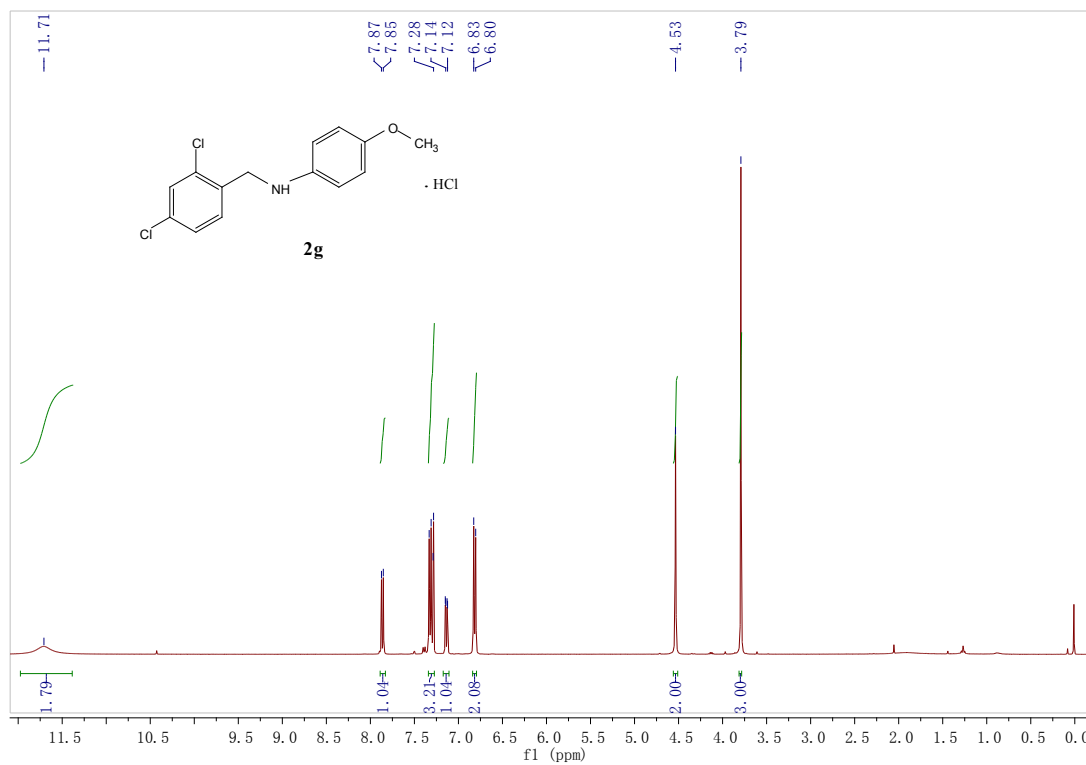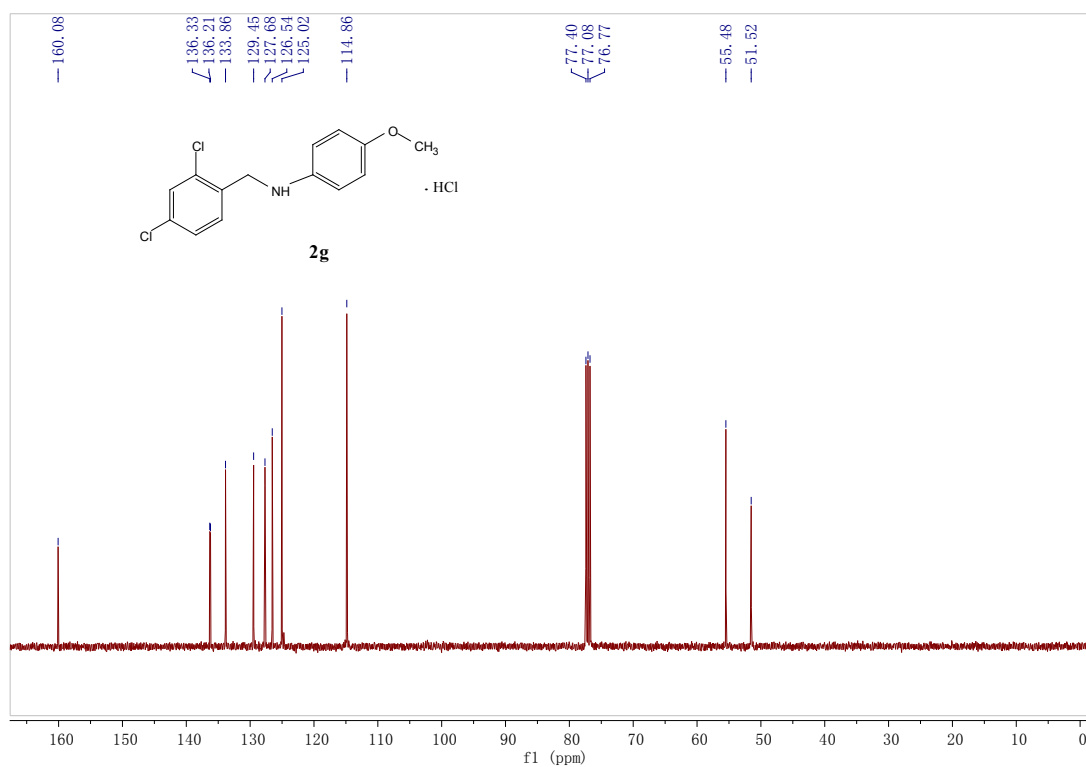

*N*-(4-Methoxybenzyl)-1-naphthalenamine (**2h**):

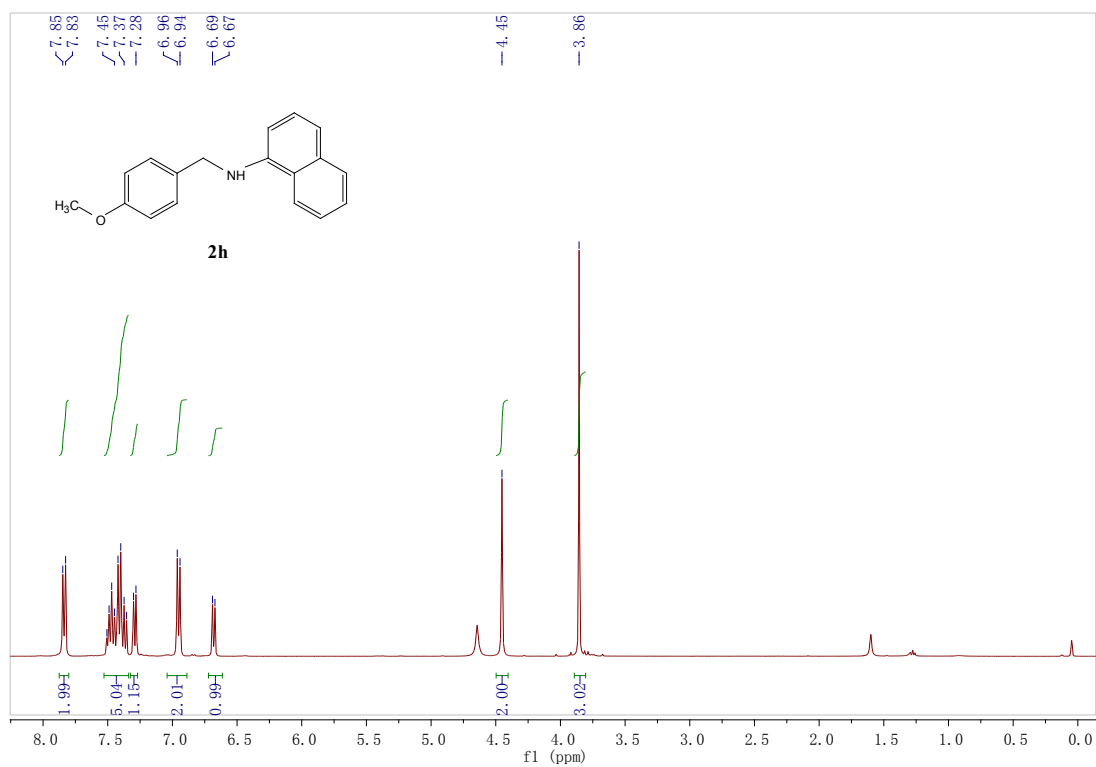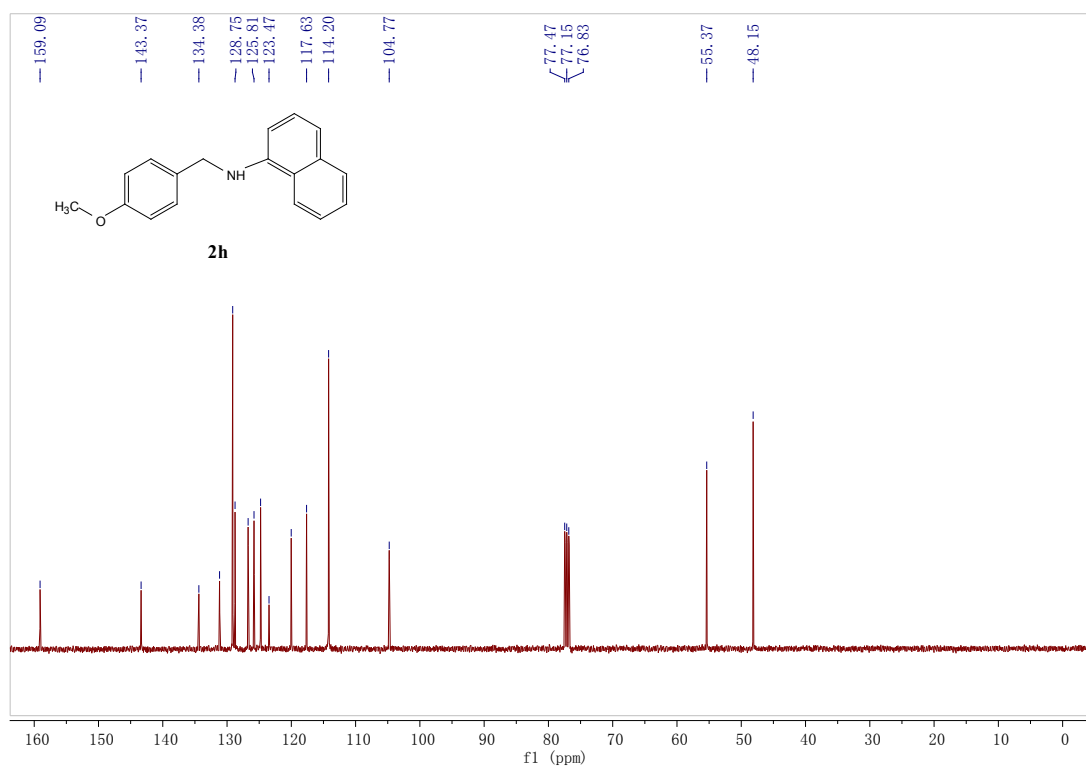

*N*-(2,4-Dichlorobenzyl)-1-naphthalenamine hydrochloride (**2i**):

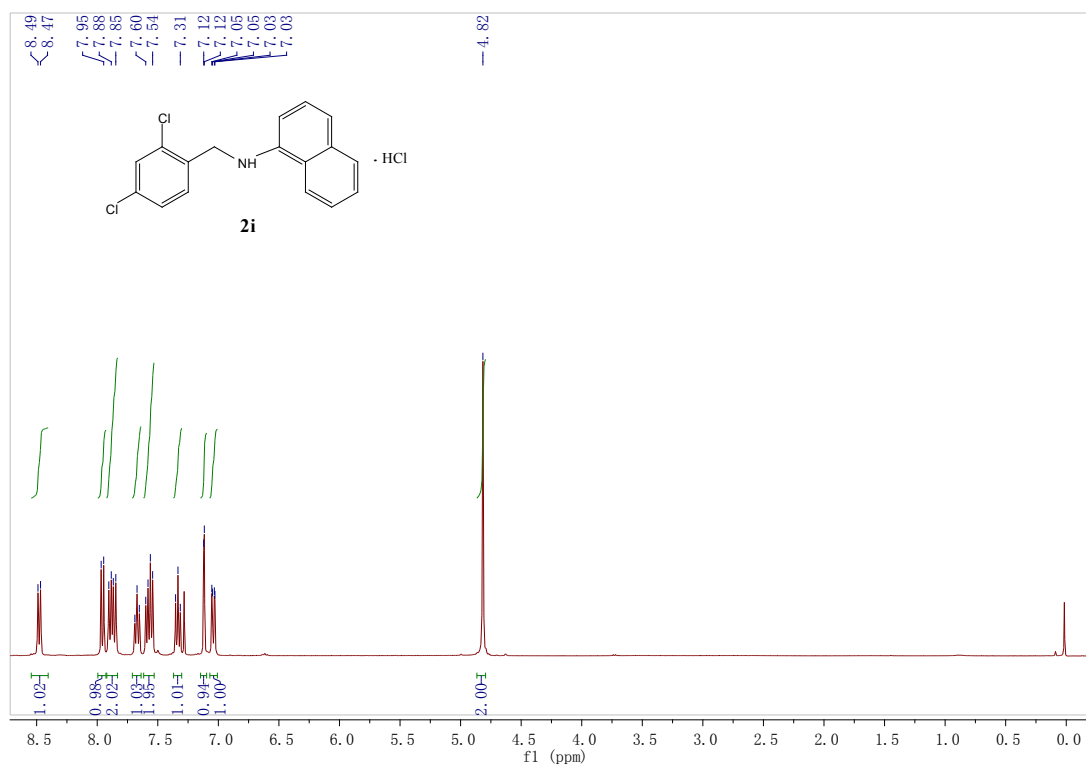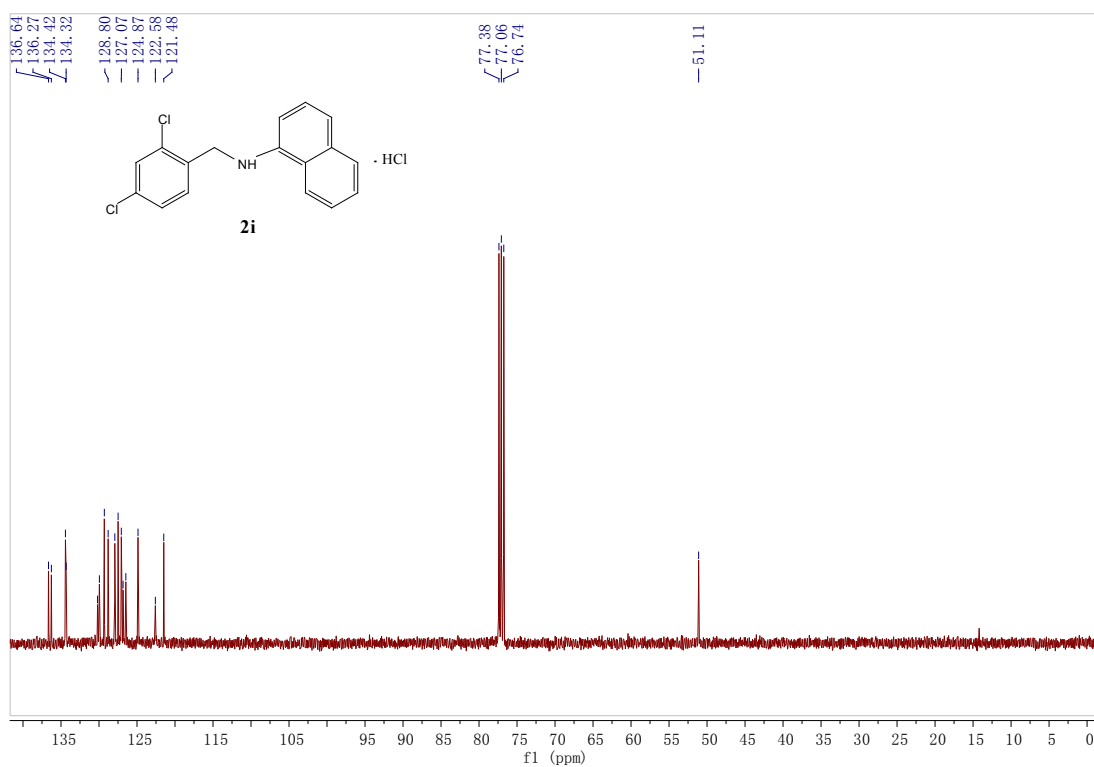

4-Bromo-N-(2,4-dichlorobenzyl)aniline hydrochloride (**2m**):

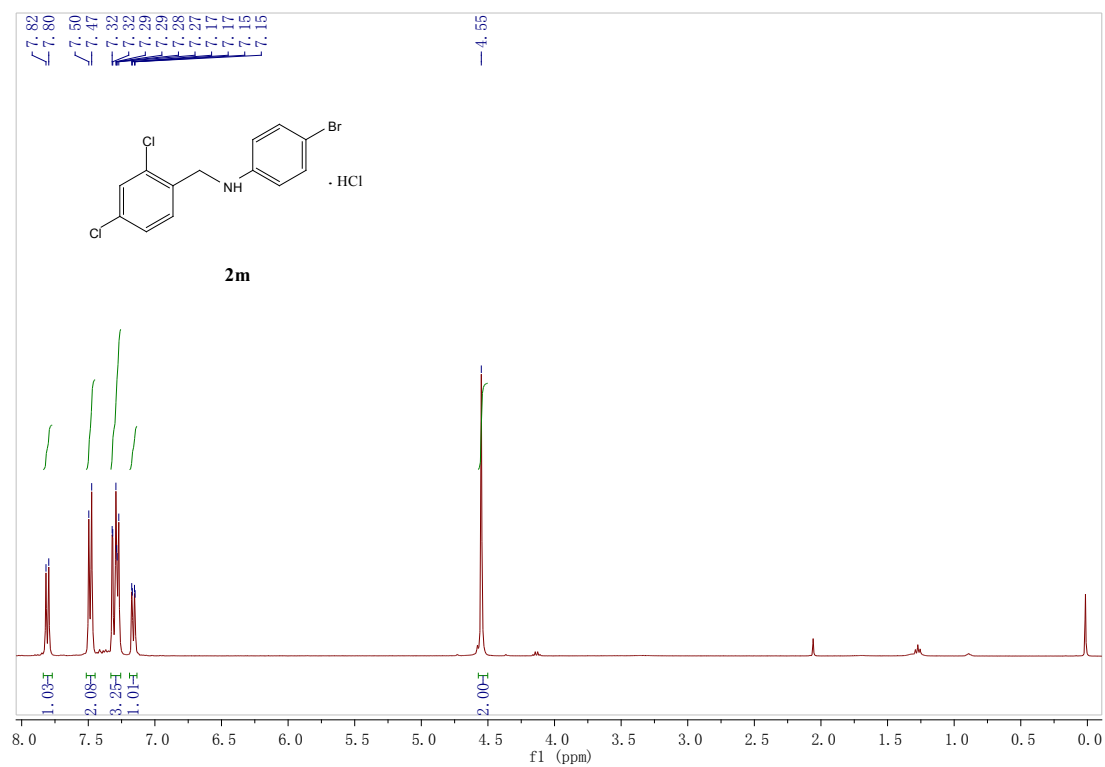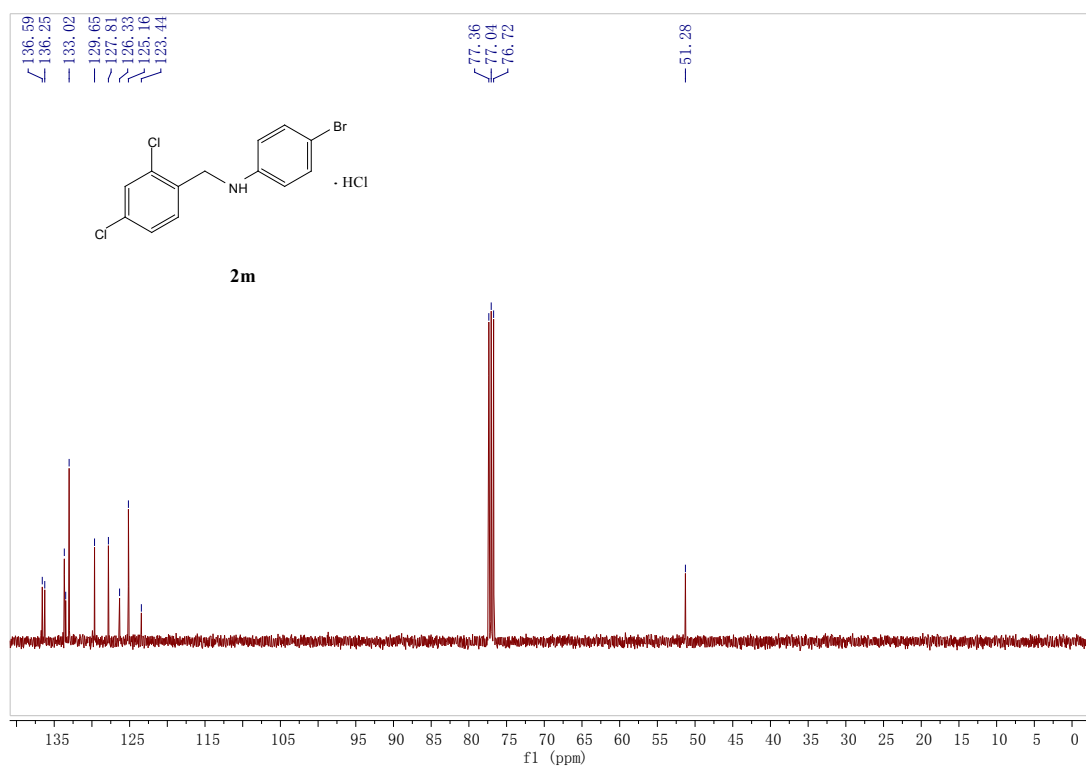

Supplement: c4ra04528a1.pdf [file c4ra04528a1.pdf]
